# Supplementary material for: Economic Evaluation of Mailed Home-Based Human Papillomavirus Self-sampling Kits for Cervical Cancer Screening
Source: PubMed Central journal article supplement (PMC10034577; doi:10.1001/jamanetworkopen.2023.4052), 2023-03-22

## Supplementary Online Content

Meenan RT, Troja C, Buist DSM, et al. Economic evaluation of mailed home-based human papillomavirus self-sampling kits for cervical cancer screening. *JAMA Netw Open*. 2023;6(3):e234052. doi:10.1001/jamanetworkopen.2023.4052

**eTable.** Baseline Characteristics of Intervention and Control Group Participants

**eFigure 1.** Medicare-Based Cost-effectiveness Acceptability Curves by Screening History

**eFigure 2.** Medicare-Based Cost-effectiveness Acceptability Curves by Age Group

This supplemental material has been provided by the authors to give readers additional information about their work.

**eTable.** Baseline Characteristics of Intervention and Control Group Participants

| Characteristics <sup>a</sup>                                   | Intervention (n = 9843) <sup>b</sup> | Control (n = 9891) |
|----------------------------------------------------------------|--------------------------------------|--------------------|
| Age at randomization, y                                        |                                      |                    |
| 30-34                                                          | 808 (8.2)                            | 794 (8.0)          |
| 35-39                                                          | 932 (9.5)                            | 915 (9.3)          |
| 40-44                                                          | 1194 (12.1)                          | 1185 (12.0)        |
| 45-49                                                          | 1380 (14.0)                          | 1374 (13.9)        |
| 50-54                                                          | 1682 (17.1)                          | 1707 (17.3)        |
| 55-59                                                          | 1938 (19.7)                          | 1943 (19.6)        |
| 60-64                                                          | 1909 (19.4)                          | 1973 (19.9)        |
| Race <sup>c</sup>                                              |                                      |                    |
| White                                                          | 7018 (76.4)                          | 7111 (77.1)        |
| Asian                                                          | 893 (9.7)                            | 880 (9.5)          |
| Black or African American                                      | 438 (4.8)                            | 431 (4.7)          |
| Native Hawaiian or other Pacific Islander                      | 151 (1.6)                            | 139 (1.5)          |
| American Indian/Alaska Native                                  | 147 (1.6)                            | 145 (1.6)          |
| >1 Race                                                        | 285 (3.1)                            | 283 (3.1)          |
| Other                                                          | 250 (2.7)                            | 235 (2.5)          |
| Unknown                                                        | 661 (6.7)                            | 667 (6.7)          |
| Ethnicity <sup>c</sup>                                         |                                      |                    |
| Non-Hispanic                                                   | 8710 (94.7)                          | 8761 (94.8)        |
| Hispanic                                                       | 486 (5.3)                            | 480 (5.2)          |
| Unknown                                                        | 647 (6.6)                            | 650 (6.6)          |
| Length of health plan enrollment, y                            |                                      |                    |
| 3.4 to <5                                                      | 2230 (22.7)                          | 2240 (22.6)        |
| 5 to <10                                                       | 3115 (31.6)                          | 3045 (30.8)        |
| ≥10                                                            | 4498 (45.7)                          | 4606 (46.6)        |
| Time since last Papanicolaou test (by length of enrollment), y |                                      |                    |
| Enrolled 3.4 to <5 y                                           |                                      |                    |
| No.                                                            | 2230                                 | 2240               |
| No Papanicolaou test                                           | 1526 (68.4)                          | 1530 (68.3)        |
| >3.4 to <5                                                     | 704 (31.6)                           | 710 (31.7)         |
| Enrolled 5 to <10 y                                            |                                      |                    |
| No.                                                            | 3115                                 | 3045               |
| No Papanicolaou test                                           | 1056 (33.9)                          | 1070 (35.1)        |
| >3.4 to <5                                                     | 1519 (48.8)                          | 1468 (48.2)        |
| 5 to <10                                                       | 540 (17.3)                           | 507 (16.7)         |
| Enrolled ≥10 y                                                 |                                      |                    |
| No.                                                            | 4498                                 | 4606               |
| No Papanicolaou test                                           | 694 (15.4)                           | 666 (14.5)         |
| >3.4 to <5                                                     | 2186 (48.6)                          | 2252 (48.9)        |
| 5 to <10                                                       | 1143 (25.4)                          | 1182 (25.7)        |
| ≥10                                                            | 475 (10.6)                           | 506 (11.0)         |

|                                                                                                                                                                                                                                                                                                                                                                                                                                                                                                     |                        |                        |
|-----------------------------------------------------------------------------------------------------------------------------------------------------------------------------------------------------------------------------------------------------------------------------------------------------------------------------------------------------------------------------------------------------------------------------------------------------------------------------------------------------|------------------------|------------------------|
| Women's US Census block, median household income, median (IQR), \$                                                                                                                                                                                                                                                                                                                                                                                                                                  | 66 474 (50 343-85 000) | 65 950 (50 536-83 949) |
| Travel time from women's home to primary care clinic, min                                                                                                                                                                                                                                                                                                                                                                                                                                           |                        |                        |
| <10                                                                                                                                                                                                                                                                                                                                                                                                                                                                                                 | 3254 (33.4)            | 3236 (33.1)            |
| 10 to <20                                                                                                                                                                                                                                                                                                                                                                                                                                                                                           | 4086 (41.9)            | 4048 (41.4)            |
| 20 to <30                                                                                                                                                                                                                                                                                                                                                                                                                                                                                           | 1407 (14.4)            | 1415 (14.5)            |
| ≥30                                                                                                                                                                                                                                                                                                                                                                                                                                                                                                 | 1004 (10.3)            | 1072 (11.0)            |
| Unknown                                                                                                                                                                                                                                                                                                                                                                                                                                                                                             | 92 (0.9)               | 120 (1.2)              |
| Body mass index <sup>d</sup>                                                                                                                                                                                                                                                                                                                                                                                                                                                                        |                        |                        |
| <18.5                                                                                                                                                                                                                                                                                                                                                                                                                                                                                               | 109 (1.3)              | 98 (1.2)               |
| 18.5-24.9                                                                                                                                                                                                                                                                                                                                                                                                                                                                                           | 2238 (26.5)            | 2248 (26.7)            |
| 25-29.9                                                                                                                                                                                                                                                                                                                                                                                                                                                                                             | 2168 (25.7)            | 2220 (26.3)            |
| 30-34.9                                                                                                                                                                                                                                                                                                                                                                                                                                                                                             | 1549 (18.4)            | 1603 (19.0)            |
| 35-39.9                                                                                                                                                                                                                                                                                                                                                                                                                                                                                             | 1119 (13.3)            | 1080 (12.8)            |
| ≥40                                                                                                                                                                                                                                                                                                                                                                                                                                                                                                 | 1248 (14.8)            | 1184 (14.0)            |
| Unknown                                                                                                                                                                                                                                                                                                                                                                                                                                                                                             | 1412 (14.3)            | 1458 (14.7)            |
| Tobacco use                                                                                                                                                                                                                                                                                                                                                                                                                                                                                         |                        |                        |
| Never                                                                                                                                                                                                                                                                                                                                                                                                                                                                                               | 5237 (61.2)            | 5232 (61.3)            |
| Current                                                                                                                                                                                                                                                                                                                                                                                                                                                                                             | 1276 (14.9)            | 1290 (15.1)            |
| Former                                                                                                                                                                                                                                                                                                                                                                                                                                                                                              | 2041 (23.9)            | 2020 (23.6)            |
| Unknown                                                                                                                                                                                                                                                                                                                                                                                                                                                                                             | 1289 (13.1)            | 1349 (13.6)            |
| Charlson Comorbidity Index score <sup>e</sup>                                                                                                                                                                                                                                                                                                                                                                                                                                                       |                        |                        |
| 0                                                                                                                                                                                                                                                                                                                                                                                                                                                                                                   | 7967 (80.9)            | 8052 (81.4)            |
| 1                                                                                                                                                                                                                                                                                                                                                                                                                                                                                                   | 1087 (11.0)            | 1128 (11.4)            |
| 2                                                                                                                                                                                                                                                                                                                                                                                                                                                                                                   | 432 (4.4)              | 385 (3.9)              |
| ≥3                                                                                                                                                                                                                                                                                                                                                                                                                                                                                                  | 357 (3.6)              | 326 (3.3)              |
| Randomization year                                                                                                                                                                                                                                                                                                                                                                                                                                                                                  |                        |                        |
| 2014                                                                                                                                                                                                                                                                                                                                                                                                                                                                                                | 4207 (42.7)            | 4254 (43.0)            |
| 2015                                                                                                                                                                                                                                                                                                                                                                                                                                                                                                | 3570 (36.3)            | 3571 (36.1)            |
| 2016                                                                                                                                                                                                                                                                                                                                                                                                                                                                                                | 2066 (21.0)            | 2066 (20.9)            |
| Abbreviation: IQR, interquartile range.                                                                                                                                                                                                                                                                                                                                                                                                                                                             |                        |                        |
| <sup>a</sup> Based on electronic medical record (EMR) data.                                                                                                                                                                                                                                                                                                                                                                                                                                         |                        |                        |
| <sup>b</sup> Baseline characteristics are not available for 117 participants who opted out of EMR review.                                                                                                                                                                                                                                                                                                                                                                                           |                        |                        |
| <sup>c</sup> Race and ethnicity from EMR data per patient self-report at usual care patient registration via preset multi-select categorical options, with "other" allowing free text entry. The study variable was programmatically categorized into the displayed categories by coding any multiple selections as "more than one race". Manual coding of the "other" category was precluded because IRB approval did not allow individual-level data for those opting out of study participation. |                        |                        |
| <sup>d</sup> Calculated as weight in kilograms divided by height in meters squared.                                                                                                                                                                                                                                                                                                                                                                                                                 |                        |                        |
| <sup>e</sup> Charlson ME, Carrozzino D, Guidi J, Patierno C. Charlson Comorbidity Index: A critical review of clinimetric properties. <i>Psychother Psychosom.</i> 2022;91:8–35.                                                                                                                                                                                                                                                                                                                    |                        |                        |
|                                                                                                                                                                                                                                                                                                                                                                                                                                                                                                     |                        |                        |

**eFigure 1.** Medicare-Based Cost-effectiveness Acceptability Curves by Screening History

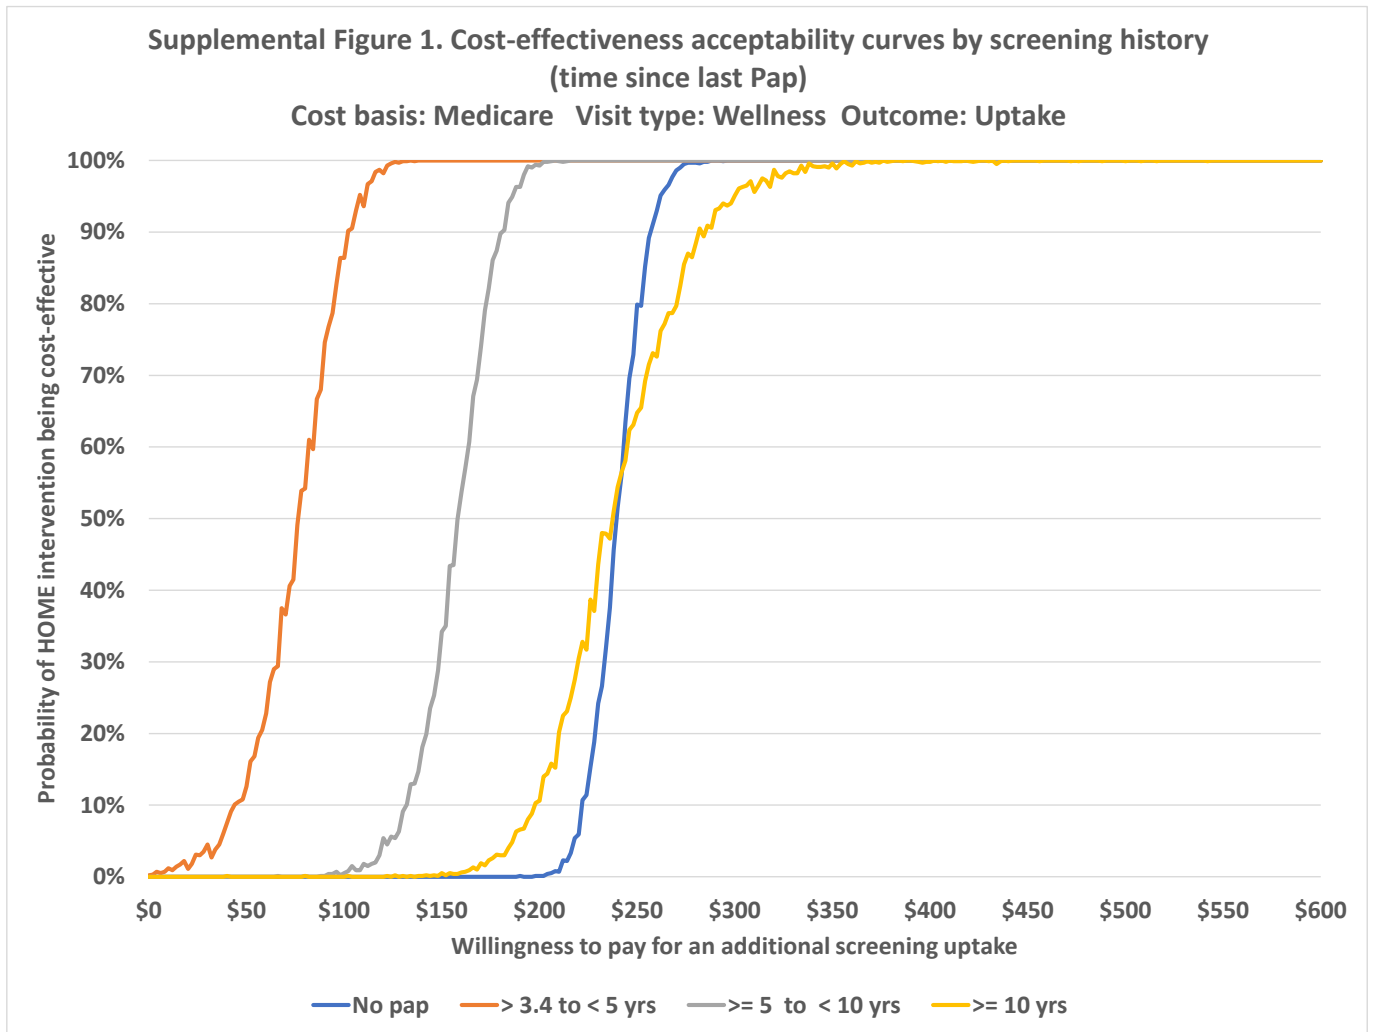

**eFigure 2.** Medicare-Based Cost-effectiveness Acceptability Curves by Age Group

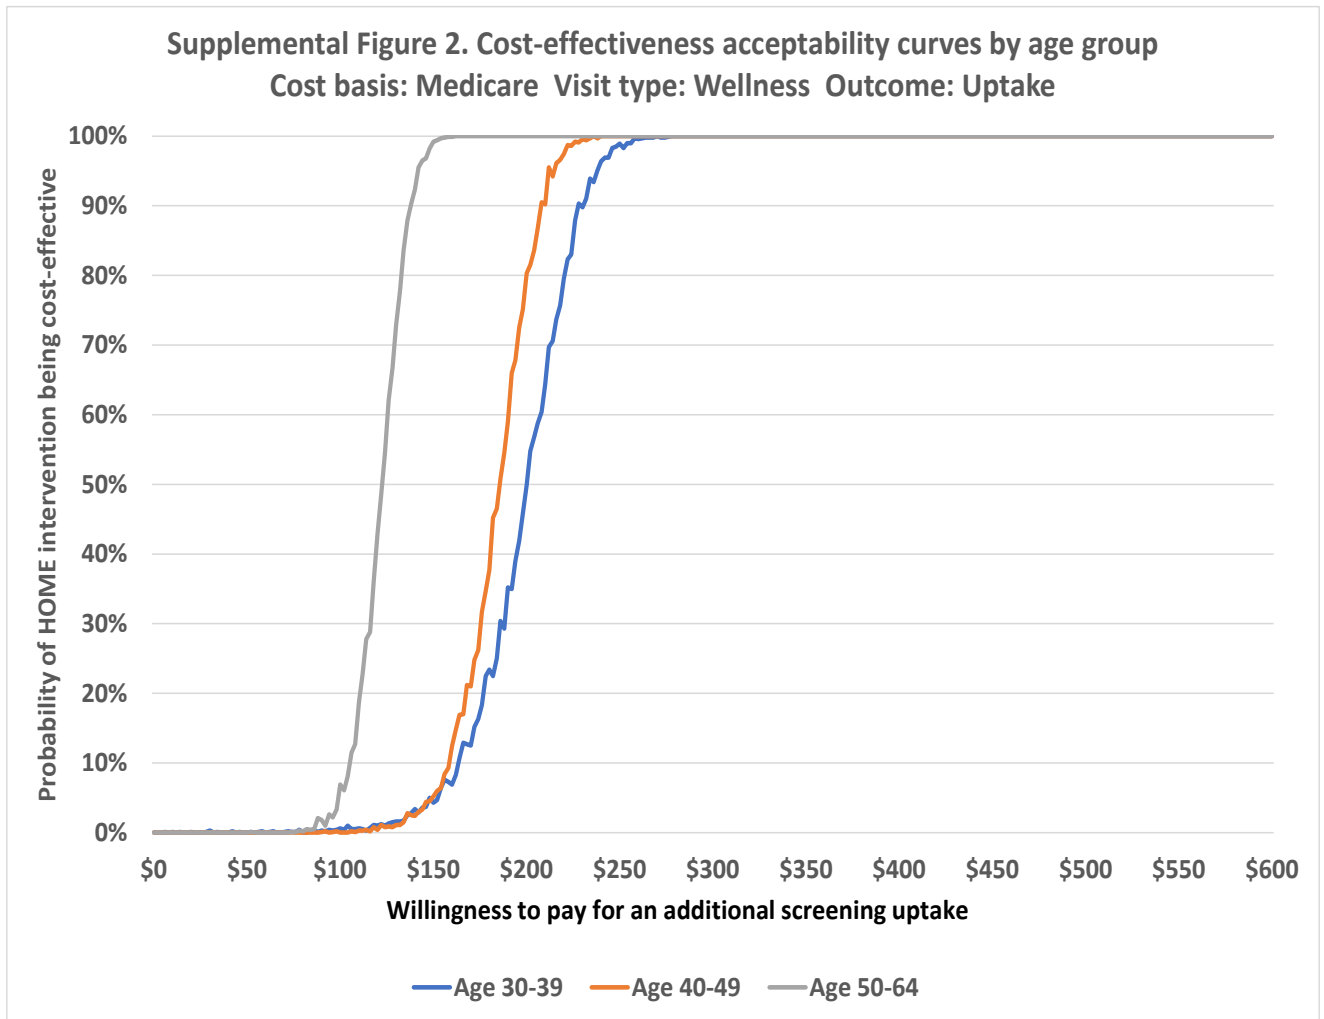

Supplement: jamanetwopen-e234052-s001.pdf [file jamanetwopen-e234052-s001.pdf]
