# Supplementary material for: Economic Evaluation of Mailed Home-Based Human Papillomavirus Self-sampling Kits for Cervical Cancer Screening
Source: PubMed Central journal article supplement (PMC10034577; doi:10.1001/jamanetworkopen.2023.4052), 2023-03-22
Supplement: jamanetwopen-e234052-s002.pdf [file jamanetwopen-e234052-s002.pdf]

## Data Sharing Statement

Meenan. Economic Evaluation of Mailed Home-Based Human Papillomavirus Self-Sampling Kits for Cervical Cancer Screening. *JAMA Netw Open*. Published March 22, 2023.

doi:10.1001/jamanetworkopen.2023.4052

### Data

**Data available:** Yes

**Data types:** Deidentified participant data, Data dictionary

**How to access data:** Data requests must be made to [richard.meenan@kpchr.org](mailto:richard.meenan@kpchr.org).

**When available:** With publication

### Supporting Documents

**Document types:** None

### Additional Information

**Who can access the data:** Deidentified participant data and a data dictionary will be made available upon publication to researchers whose proposed use of the data has been approved.

**Types of analyses:** Data will be available for a clearly specified purpose only.

**Mechanisms of data availability:** Data will be made available after approval of a concept proposal aligned with current data approvals, and with a signed data access agreement.

**Any additional restrictions:** Data will be made available without investigator support to researchers with adequate resources to cover regulatory and data sharing costs.
